# Supplementary material for: Kaiso protects human umbilical vein endothelial cells against apoptosis by differentially regulating the expression of B-cell CLL/lymphoma 2 family members
Source: PubMed Central journal article supplement (PMC5540925; doi:10.1038/s41598-017-07559-0), 2017-08-02
Supplement: 41598_2017_7559_MOESM1_ESM.pdf [file 41598_2017_7559_MOESM1_ESM.pdf]

---

Kaiso protects human umbilical vein endothelial cell against apoptosis by differentially regulating the expressions of B-cell CLL/lymphoma 2 family members

Xiaodong Xue<sup>1</sup>, Jian Zhang<sup>1</sup>, Huai Lan<sup>1</sup>, Yinli Xu<sup>1</sup> and Huishan Wang<sup>1\*</sup>

<sup>1</sup>Department of Cardiovascular Surgery, General Hospital of Shenyang Military Area Command, No.83, Wenhua Road, Shenhe District, Shenyang City, Liaoning, China 110016

\*Corresponding author: huishanw@126.com

## Supplementary Tables

### Supplementary Table S1: Primers used in quantitative real-time PCR

| Gene name | Oligo name | Sequence (5'-3')        |
|-----------|------------|-------------------------|
| Kaiso     | sense      | CAGGGCAGTTATTAGGAGTGAAA |
|           | antisense  | CAGAATCAGGAGGTAAAGGCTCA |
| p120ctn   | sense      | TTCAGGCTGAGATTGGGCAG    |
|           | antisense  | AGAACCACTCATCTTTGCCCT   |
| BIK       | sense      | ACGACCAGACTGAGGACATCA   |
|           | antisense  | CACCTGTTCGCAGGACACC     |
| BAX       | sense      | AGAGGTCTTTTTCCGAGTGGC   |
|           | antisense  | TGATGGTTCTGATCAGTTCCG   |
| BCL2      | sense      | TCGTTGCCTTATGCATTTGTT   |
|           | antisense  | ACTTGATTCTGGTGTTC       |
| ACTB      | sense      | TCCTTCCTGGGCATGGAGT     |
|           | antisense  | CAGGAGGAGCAATGATCTTGAT  |
| GAPDH     | sense      | GGGTGTGAACCATGAGAAGTATG |
|           | antisense  | GATGGCATGGACTGTGGTCAT   |

### Supplementary Table S2: Primers used in CHIP

| Gene name | Primer pair | Oligo name | Sequence (5'-3')     |
|-----------|-------------|------------|----------------------|
| BCL2      | 1           | F(-3902):  | GTTTCCTTCTGGCTGCCCC  |
|           |             | R(3601):   | GATCCTCCTTCTTGCCCTTC |
|           | 2           | F(-3602):  | GAAGGGCAAGAAGGAGGATC |

|          |          |                      |                      |                      |
|----------|----------|----------------------|----------------------|----------------------|
|          | 3        | R(-3301):            | CCAGAAAAGCACACCAAATT |                      |
|          |          | F(-3302):            | AATTTGGTGTGCTTTTCTGG |                      |
|          | 4        | R(-3001):            | GTGTGCAGTGGTGCATCTC  |                      |
|          |          | F(-3001):            | GAGATCGCACCACTGCACAC |                      |
|          | 5        | R(-2700):            | AAGCAGACAGTTTTAAATTA |                      |
|          |          | F(-2701):            | TAATTTAAAACGTCTGCTT  |                      |
|          | 6        | R(-2400):            | CCTAGTCCGTGGCCAGGCC  |                      |
|          |          | F(-2401):            | GGCCTGGGCCACGGACTAGG |                      |
|          | 7        | R(-2100):            | TGGGAGTGTGTGTGTCGCT  |                      |
|          |          | F(-2101):            | AGGCGACACACACTCCCA   |                      |
|          | 8        | R(-1800):            | GCGGCGCGGTGGGTGTGCGC |                      |
|          |          | F(-1801):            | GCGCACACCCACCGCGCCGC |                      |
|          | 9        | R(-1500):            | CTTACTTCATTCTCTGCACA |                      |
|          |          | F(-1501):            | TGTGCAGAGAATGAAGTAAG |                      |
|          | 10       | R(-1200):            | GCACCCCACCGGCGCACCCC |                      |
|          |          | F(-1201):            | GGGGTGCGCCGTTGGGGTGC |                      |
|          | 11       | R(-900):             | CGCTTCACGCCTCCCCAGGA |                      |
|          |          | F(-901):             | TCCTGGGGAGGCGTGAAGCG |                      |
|          | 12       | R(-600):             | CTCTCCAGTTATAGCTGATT |                      |
|          |          | F(-601):             | AATCAGCTATAACTGGAGAG |                      |
|          | 13       | R(-300):             | AAAACAACTAATAAGTAAA  |                      |
|          |          | F(-301):             | TTTACTTATTAGTTTGT    |                      |
|          | BAX      | 1                    | R(-1):               | GAGGAAAGGAGGAAAGTAAC |
|          |          |                      | F(-971)              | CCTGCTGATCTATCAGCACA |
| 2        |          | R(-644)              | GTGCAGTGGCCCAATCATGG |                      |
|          |          | F(-645)              | CCATGATTGGGCCACTGCAC |                      |
| 3        |          | R(-317)              | AGCTCTCCCCAGCGCAGAAG |                      |
|          |          | F(-316)              | CTTCTGCGCTGGGGAGAGCT |                      |
| BIK      |          | 1                    | R(-1)                | ACCGCCGCTCCCGCCGCCGC |
|          |          |                      | F(-3001)             | AAAATTAGCCGGGTGTGGTG |
|          |          | 2                    | R(-2700)             | TTCAAGCTCCCCACCCTGCC |
|          | F(-2701) |                      | GGCAGGGTGGGGAGCTTGAA |                      |
|          | 3        | R(-2400)             | GCTTTGTGCTCCTGGAGACC |                      |
|          |          | F(-2401)             | GGTCTCCAGGAGCACAAAGC |                      |
|          | 4        | R(-2100)             | CCCGCCTCTAATAAAAATAC |                      |
|          |          | F(-2101)             | GTATTTTTATTAGAGGCGGG |                      |
|          | 5        | R(-1800)             | GTTTGTTACACAGGACACT  |                      |
| F(-1801) |          | AGTGTCCTGTGTGAACAAAC |                      |                      |
| 6        | R(-1500) | AAATCTAATGGCCTAGTTCA |                      |                      |
|          | F(-1501) | TGAACTAGGCCATTAGATTT |                      |                      |
| 7        | R(-1200) | CAGAGTGGGGAGGCAGAGAG |                      |                      |
|          | F(-1201) | CTCTCTGCCTCCCCACTCTG |                      |                      |
|          |          | R(-900)              | TCACCCCATACAGTGTCTTA |                      |

|  |    |         |                      |
|--|----|---------|----------------------|
|  | 8  | F(-901) | TAAGACACTGTATGGGGTGA |
|  |    | R(-600) | AAGTTCTCCTCGGACACCAG |
|  | 9  | F(-601) | CTGGTGTCCGAGGAGAACTT |
|  |    | R(-300) | TGGAGGGCAGTGGCACAATC |
|  | 10 | F(-301) | GATTGTGCCACTGCCCTCCA |
|  |    | R(-1)   | TTCTCCTCTGGGGCAAAAAG |

**Supplementary Table S3: Primers used in MSP**

| Gene name | Primer pair | Oligo name | Sequence (5'-3')          |
|-----------|-------------|------------|---------------------------|
| BAX       | 1           | F(M)(-635) | TTT TAGTTTGGGTAATATAGTGAG |
|           |             | R(M)(-516) | ATTACAAACATAAACTACCGCGC   |
|           |             | F(U)(-635) | TTT TAGTTTGGGTAATATAGTGAG |
|           |             | R(U)(-516) | ATTACAAACATAAACTACCACAC   |
|           | 2           | F(M)(-532) | TAGTTTATGTTTGTAATTTTAGCGT |
|           |             | R(M)(-428) | TAAATCTAACAATATAACCCACGCC |
|           |             | F(U)(-532) | GTAGTTTATGTTTGTAATTTAGTGT |
|           |             | R(U)(-428) | TAAATCTAACAATATAACCCACACC |
|           | 3           | F(M)(-404) | TTTAGTTTTAGTTATTTATAACGTT |
|           |             | R(M)(-302) | ATTTAAACTCTCCCAACGCA      |
|           |             | F(U)(-404) | TTTAGTTTTAGTTATTTATAACATT |
|           |             | R(U)(-302) | ATTTAAACTCTCCCAACACA      |

M:methylated, U: unmethylated

**Supplementary Table S4: Primers for genomic DNA amplification in luciferase reporter assay**

| Gene name | Oligo name | Sequence (5'-3')                       |
|-----------|------------|----------------------------------------|
| BCL2      | F(MluI)    | GAT <u>ACGCGT</u> GCTTCTAGCGCTCGGCACCG |
|           | R(SmaI)    | GAT <u>CCCGGG</u> TGAGGAAAGGAGGAAAGTAA |
| BAX       | F(KpnI)    | GAT <u>GGTACCC</u> TGCTGATCTATCAGCACA  |
|           | R(XhoI)    | GAT <u>CTCGAG</u> ACGTGAGAGCCCCGCTGAAC |
| BIK       | F(MluI)    | GAT <u>ACGCGT</u> GGTCAGCCACTGCAGCTCCA |
|           | R(XhoI)    | GAT <u>CTCGAG</u> TCTGGGGCAAAAAGACAGCA |

Underlined: inserted restrictive endonuclease recognition sites

**Supplementary Table S5: Site-directed mutations in luciferase reporter assay**

| Gene name | Promoter position | Site mutation (5'-3') | Sequence similarity to 5'-TCCTGCNA-3' |
|-----------|-------------------|-----------------------|---------------------------------------|
|-----------|-------------------|-----------------------|---------------------------------------|

|      |               |                                               |               |
|------|---------------|-----------------------------------------------|---------------|
| BCL2 | -1040 ~ -1033 | TCCT <u>GC</u> CT → TC <u>CA</u> ACCT         | 87.5% → 62.5% |
|      | -970 ~ -963   | TCCT <u>GC</u> CT → TC <u>CA</u> ACCT         | 87.5% → 62.5% |
|      | -728 ~ -721   | TCCT <u>GC</u> CGG → TC <u>CA</u> ACGG        | 87.5% → 62.5% |
|      | -193 ~ -186   | TCCT <u>GC</u> CAT → TC <u>CA</u> ACAT        | 87.5% → 62.5% |
| BAX  | -389 ~ -382   | TCCT <u>GC</u> CT → TC <u>CA</u> ACCT         | 87.5% → 62.5% |
| BIK  | -1070 ~ -1063 | AGCT <u>G</u> CAA → AG <u>A</u> GCAA          | 75% → 50%     |
|      | -695 ~ -688   | CCCT <u>G</u> CAG → <u>C</u> GATGAG           | 75% → 50%     |
|      | -390 ~ -383   | CC <u>C</u> AGCTA → <u>C</u> G <u>A</u> AGCTA | 75% → 50%     |
|      | -75 ~ -68     | TCCT <u>G</u> TGA → TC <u>CA</u> ATGA         | 87.5% → 62.5% |
|      | -36 ~ -29     | TC <u>C</u> AGTCA → <u>T</u> G <u>A</u> AGTCA | 75% → 50%     |

Underlined: mutated nucleotides

**Supplementary Table S6: Probes used in EMSA**

| Gene name | Oligo name | Sequence (5'-3')              |
|-----------|------------|-------------------------------|
| BCL2      | F(3709-WT) | AAATTCCTGCATCTCATGC           |
|           | R(3709-WT) | GCATGAGATGCAGGAAATTT          |
|           | F(3709-MU) | AAATTC <u>CA</u> ACATCTCATGC  |
|           | R(3709-MU) | GCATGAGAT <u>G</u> TGGAAATTT  |
| BAX       | F(585-WT)  | TAGGGGTCCAGTCATATGCT          |
|           | R(585-WT)  | AGCATATGACTGGACCCCTA          |
|           | F(585-MU)  | ATAACGTCCTGCCTGGAAGC          |
|           | R(585-MU)  | GCTTCCAGGCAGGACGTTAT          |
| BIK       | F(-75-WT)  | GGGTCATCCTGTGAGAGAGC          |
|           | R(-75-WT)  | GCTCTCTCACAGGATGACCC          |
|           | F(-75-MU)  | GGGTCAT <u>CA</u> ATGAGAGAGC  |
|           | R(-75-MU)  | GCTCTCT <u>C</u> ATTGGATGACCC |
|           | F(-36-WT)  | TAGGGGTCCAGTCATATGCT          |
|           | R(-36-WT)  | AGCATATGACTGGACCCCTA          |
|           | F(-36-MU)  | TAGGGGT <u>G</u> AAGTCATATGCT |
|           | R(-36-MU)  | AGCATATGACT <u>T</u> CACCCCTA |

Underlined: mutated nucleotides

## Supplementary Figures

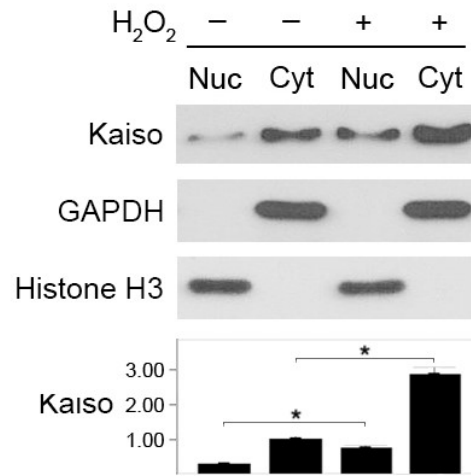

### Supplementary Figure S1: Nuclear and cytoplasmic expression of Kaiso in H<sub>2</sub>O<sub>2</sub> treated HMEC-1.

Nuclear and cytoplasmic extracts were separately prepared from HMEC-1 treated or untreated with 400 μM H<sub>2</sub>O<sub>2</sub> for 2 hours. The nuclear and cytoplasmic expressions of Kaiso were detected by Western blot. GAPDH served as a cytoplasmic marker and a loading control. Histone H3 served as a nuclear marker and a loading control. Values were presented as mean ± SD, \* p<0.01, n = 3

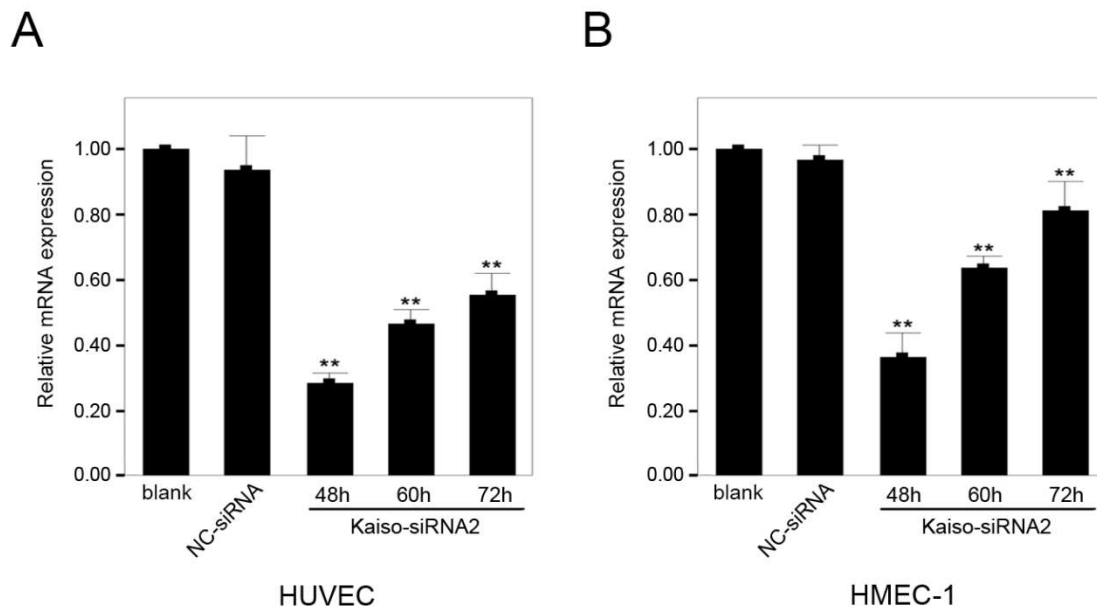

### Supplementary Figure S2: Selective silencing of Kaiso in endothelial cells.

HUVEC (A) and HMEC-1 (B) were transfected with NC-siRNA or Kaiso-siRNA2 and silencing efficiency was evaluated by quantitative real-time PCR at 48, 60 or 72 hours post transfection. Values were presented as mean  $\pm$  SD, \*  $p < 0.01$ , compared with blank,  $n = 3$ .

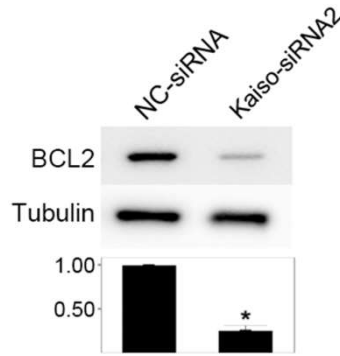

**Supplementary Figure S3: Expression of BCL2 in Kaiso knock-down HUVEC.**

HUVEC were transfected with NC-siRNA or Kaiso-siRNA2 and were cultured at 37°C for 48 hours. The expression of BCL2 was evaluated by western blot analysis. Tubulin served as a loading control. Values were presented as mean  $\pm$  SD, \*  $p < 0.01$ , compared with blank,  $n = 3$ .

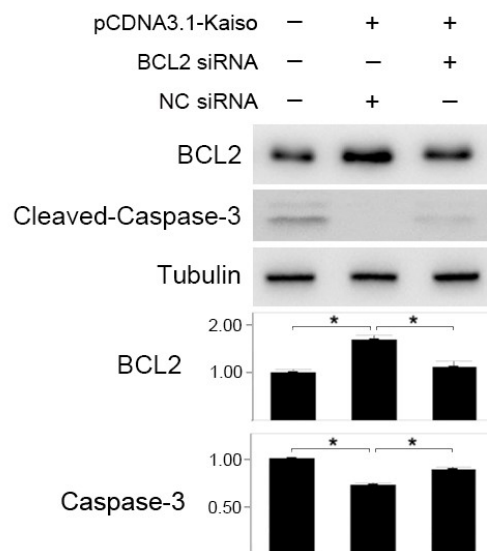

**Supplementary Figure S4: Kaiso-mediated inhibition of Caspase-3 activation was compromised by BCL2 knock down.**

HUVEC were cotransfected with pCDNA3.1-Kaiso and BCL2 siRNA.48 hours later, the cells were

treated with 400 $\mu$ M H<sub>2</sub>O<sub>2</sub> for another 8 hours. The expressions of Kaiso, BCL2 and cleaved-Caspase3 were detected by Western blot. Tubulin served as a loading control. Values were presented as mean  $\pm$  SD, \* p<0.01, n = 3.

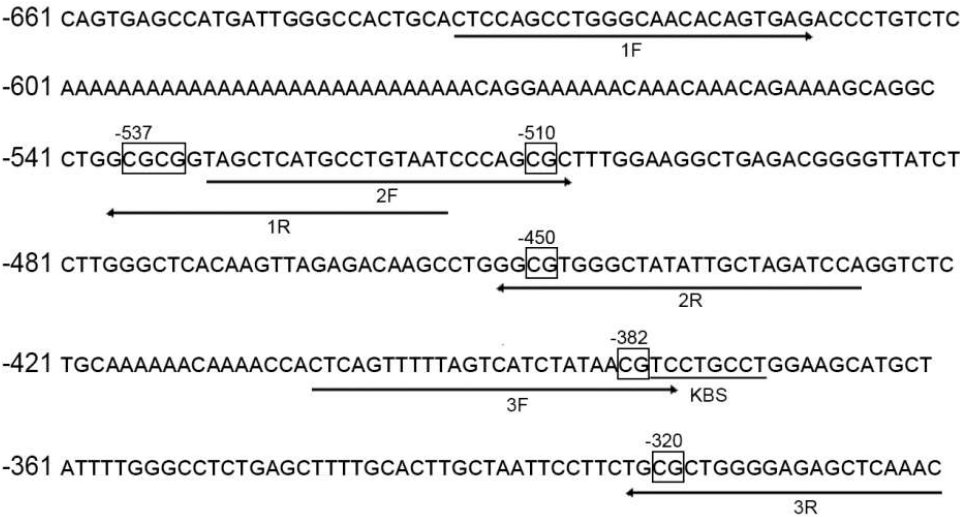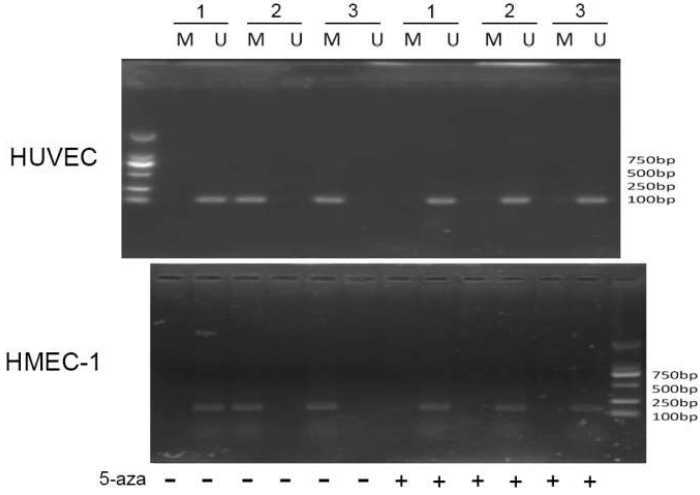

**Supplementary Figure S5: Detection of <sup>m</sup>CpG in Kaiso binding region of the BAX promoter.**

Methylated cytosines were detected by methylation specific PCR (MSP) in HUVEC and HMEC-1 treated or untreated with 5-azacytidine for 72 hours. The PCR products were resolved in 3% agarose gel (lower). Three primer sets were used as shown in the upper panel (primers were listed in the Supplementary Table S3). CpGs detected were numbered and the KBS was underlined (upper). At least, four CpGs (-510, -450, -382, -320) around the KBS were methylated and all of which were demethylated after 5-azacytidine treatment. M: methylated primer pairs; U: unmethylated primer pairs.
